# Supplementary material for: Velocity coupling of grid cell modules enables stable embedding of a low dimensional variable in a high dimensional neural attractor
Source: eLife journal article supplement (doi:10.7554/elife.48494), 2019-08-30
Supplement: supp [file elife-48494-supp-v1.zip]

Archive with 4 entries (4 files):
- elife_poa_e48494_Transparent_Reporting_File.pdf
- elife_poa_e48494_Figure_5_figure_supplement_1.eps
- elife_poa_e48494_Figure_4_figure_supplement_1.eps
- elife_poa_e48494_Figure_5_figure_supplement_2.eps
